# Supplementary material
Source: PubMed Central journal article supplement (PMC2607545)
Supplement: NIHMS81883-supplement-Experimental.pdf [file NIHMS81883-supplement-Experimental.pdf]

# The barrier to enantiomerization of *N*-Boc-2-lithopyrrolidine: the effect of chiral and achiral diamines

Taher I. Yousaf,<sup>a</sup> Roger L. Williams,<sup>a,b</sup> Iain Coldham,<sup>c</sup> and Robert E. Gawley,<sup>\*a</sup>

## Electronic Supplementary Information

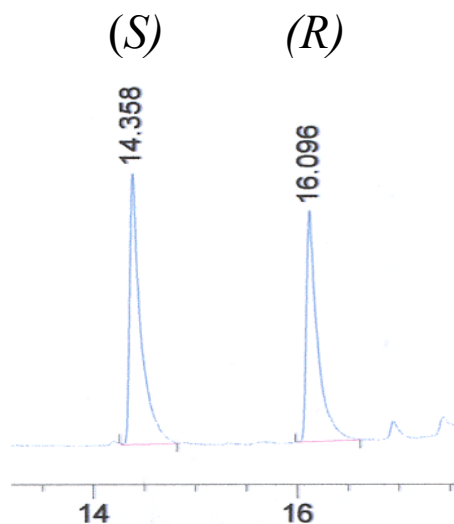

**Figure 1.** Chromatogram of (N)-Boc-2-trimethylsilylpyrrolidine run on a  $\beta$ -Cyclodextrin capillary column. The column temperature was programmed as follows:- Initial Temperature  $T = 70\text{ }^{\circ}\text{C}$  for 5 mins, followed by a gradient of  $5\text{ }^{\circ}\text{C}/\text{min}$  until  $T = 200\text{ }^{\circ}\text{C}$ , maintained for 10 mins  $\beta$ -cyclodextrin column. The regulator pressures were:  $\text{H}_2 = 6\text{ psi}$ ;  $\text{N}_2 = 52\text{ psi}$ ; Air = 50 psi.

Kinetic data were fitted to Equation 1, the integrated rate equation for a 1<sup>st</sup> order process relaxing to equilibrium:-

$$0.5 \ln [T - 2R] = -kt \quad \dots\dots\dots \text{Equation 1}$$

$T$  = total initial concentration of stannane

$R$  = concentration of 4-(*R*)- at time,  $t$ .

$k$  = rate constant for enantiomerization

Graphs plotting equation 1 for the racemisation of 4-(*S*) to 4-(*R*) with each of three ligands at four different temperatures are given below:-

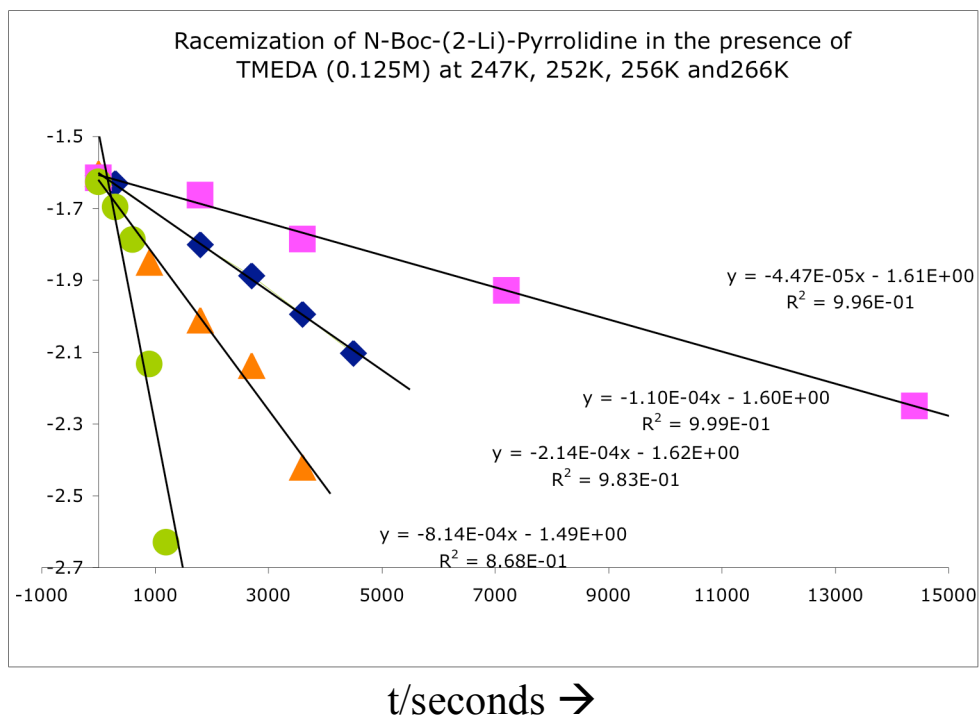

**Figure 2.** 1<sup>st</sup> order rate plots for the racemization of *N*-Boc-2-Li-pyrrolidine in the presence of TMEDA.

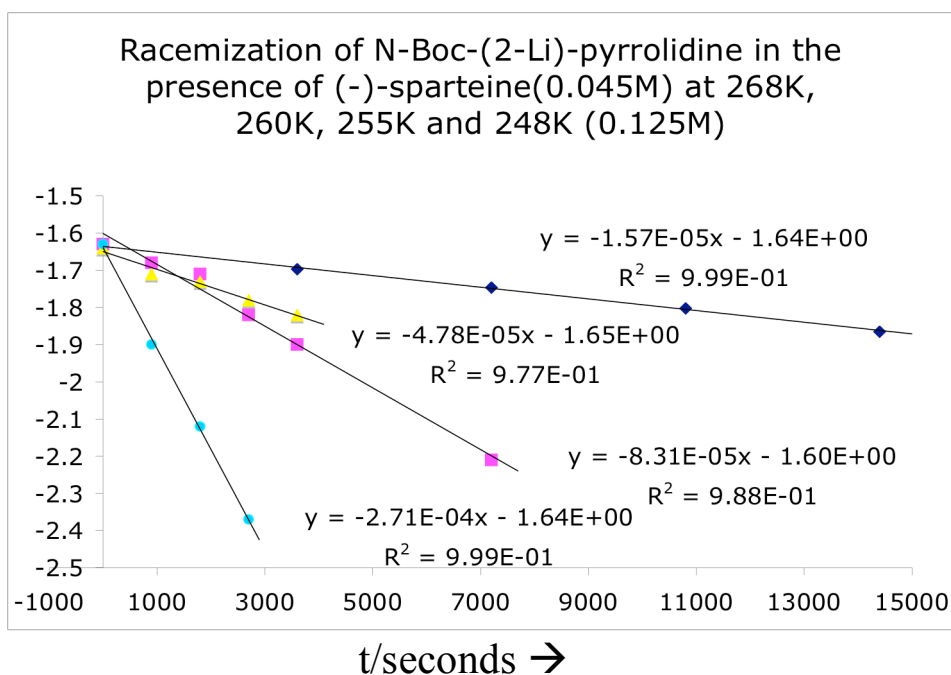

**Figure 3.** 1<sup>st</sup> order rate plots for the racemization of *N*-Boc-2-Li-pyrrolidine in the presence of sparteine.

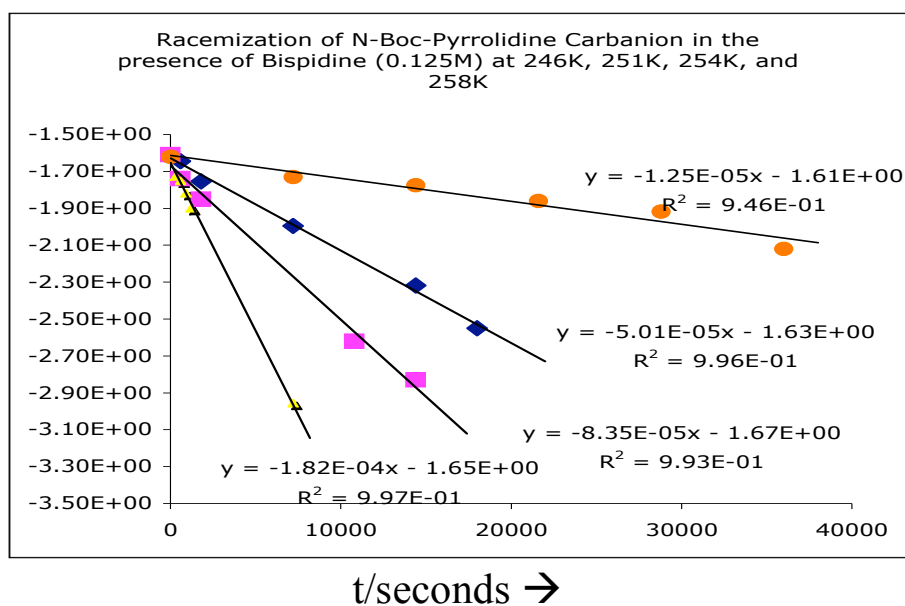

**Figure 4.** 1<sup>st</sup> order rate plots for the racemization of *N*-Boc-2-Li-pyrrolidine in the presence of bispidine.

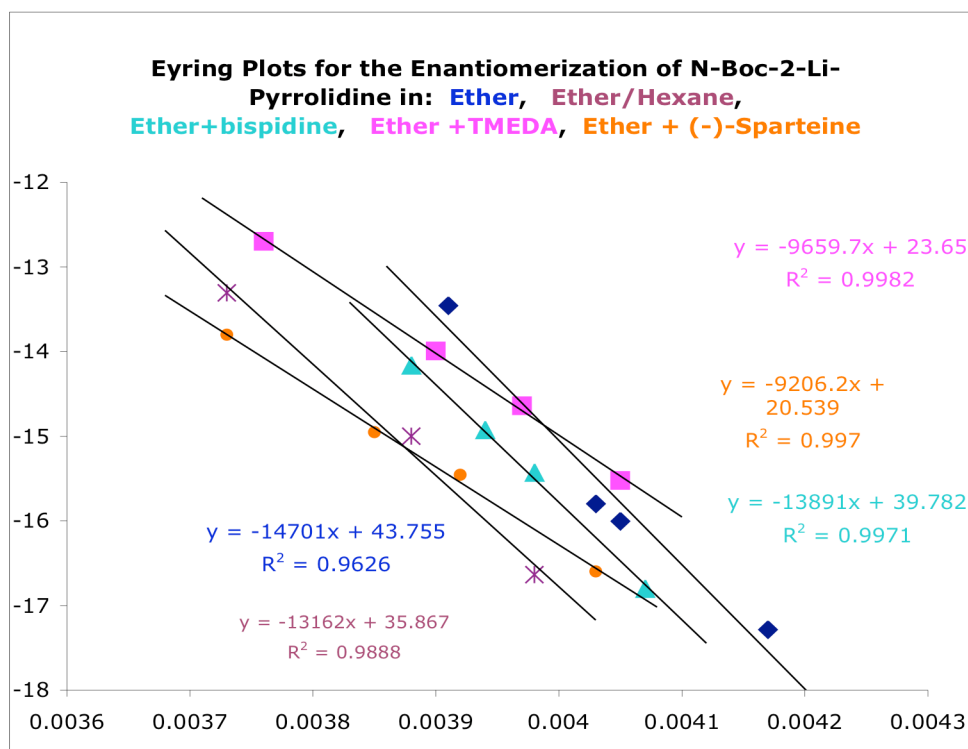

**Figure 5.** Eyring plots for the enantiomerization of *N*-Boc-2-Li-pyrrolidine in the presence and absence of diamines. Data for ether and ether/hexane are duplicated from ref. 8 for comparison, with one extra data point in the ether plot to assure continuity between experimentalists.
